# Supplementary material for: The Relationship between Handgrip Strength, Timed Up-and-Go, and Mild Cognitive Impairment in Older People during COVID-19 Pandemic Restrictions
Source: MDPI journal article supplement (doi:10.3390/bs13050410), 2023-05-14
Supplement: s1 [file s1]

**Table S1.** Correlations among scores of MoCA-B, MNA-SF, ADL, TGDS, PSQI, HGS and TUG.

|                | 1        | 2        | 3        | 4        | 5        | 6        | 7 |
|----------------|----------|----------|----------|----------|----------|----------|---|
| 1. MoCA-B      | –        |          |          |          |          |          |   |
| 2. MNA-SF      | 0.137**  | –        |          |          |          |          |   |
| 3. ADL         | 0.063    | 0.026    | –        |          |          |          |   |
| 4. TGDS        | -0.179** | -0.198** | -0.147** | –        |          |          |   |
| 5. PSQI        | 0.001    | -0.130** | -0.089   | 0.0260** | –        |          |   |
| 6. percent HGS | 0.281**  | 0.208**  | 0.051    | -0.109*  | -0.158** | –        |   |
| 7. percent TUG | -0.256** | -0.077   | -0.105*  | 0.185**  | 0.064    | -0.341** | – |

MoCA-B), Montreal Cognitive Assessment-Basic; MNA-SF, Mini Nutritional Assessment-Short Form; ADL, Activities of Daily Living; TGDS, Thai Geriatric Depression Scale; PSQI, Pittsburgh Sleep Quality Index; HGS, Handgrip Strength; TUG, Timed Up-and-Go; \*  $p < 0.05$ ; \*\*  $p < 0.01$
